# Supplementary material for: Mitochondria-targeted fluorescent probe for imaging endogenous hydrogen sulfide in cellular antioxidant stress
Source: Royal Society of Chemistry journal article supplement (doi:10.1039/d0ay01200a), 2020-01-01
Supplement: d0ay01200a1.pdf [file d0ay01200a1.pdf]

## Supporting information

### Mitochondria-targeted Fluorescent Probe for Imaging Endogenous Hydrogen Sulfide in Cellular Antioxidant Stress

Songtao Cai,<sup>a,b</sup> Chang Liu,<sup>a</sup> Song He,<sup>a</sup> Liancheng Zhao<sup>b</sup> and Xianshun Zeng<sup>\*a,b</sup>

<sup>a</sup>Tianjin Key Laboratory for Photoelectric Materials and Devices, and Key Laboratory of Display Materials & Photoelectric Devices, Ministry of Education, School of Materials Science & Engineering, Tianjin University of Technology, Tianjin 300384, China. Fax: (+86)22-60215226; Tel: (+86)22-60216748; E-mail: xshzeng@tjut.edu.cn

<sup>b</sup>School of Materials Science and Engineering, Harbin Institute of Technology, Harbin 150001, China.

## Contents

### 1. Additional spectrum and data

Table S1 Comparison of some reported probes for the detection of H<sub>2</sub>S in the literature

Fig. S1 The absorbance and fluorescence intensity of **L** versus Na<sub>2</sub>S concentration

Fig. S2 HRMS spectrum of **L** in the presence of Na<sub>2</sub>S

Fig. S3 Kinetic analysis

Fig. S4 Fluorescence responses of **L** for the detection of H<sub>2</sub>S in different pH solutions

Fig. S5 The cytotoxicity of **L** in HeLa cells

Fig. S6 -S11 <sup>1</sup>H, <sup>13</sup>C NMR and HRMS spectrum

### 2. References

#### 1. Additional data and spectrum

**Table S1** Comparison of some reported probes for the detection of H<sub>2</sub>S in the literature

| Structure of sensors                                                                | Journal                                                    | organelle-<br>targeted    | Limit of<br>detecton | λ <sub>em</sub> | Solution                                 |
|-------------------------------------------------------------------------------------|------------------------------------------------------------|---------------------------|----------------------|-----------------|------------------------------------------|
| 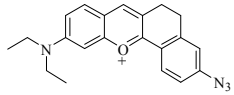 | <i>Sens Actuators B Chem.</i> , 2018, <b>256</b> , 342-350 | Mitochondria<br>-targeted | 47 μM                | 635 nm          | PBS/DMSO<br>(v/v, 8/2, 10<br>mM, pH 7.4) |
|  | <i>Spectrochim. Acta. A Mol. Biomol. Spectrosc.</i>        | NO                        | 320 nM               | 503 nm          | PBS/DMSO<br>(v/v, 1/1, 10<br>mM, pH 7.4) |

|                                                                                     |                                                             |    |         |            |                                                       |  |
|-------------------------------------------------------------------------------------|-------------------------------------------------------------|----|---------|------------|-------------------------------------------------------|--|
|                                                                                     | 2020, <b>229</b> ,<br>117987-117995                         |    |         |            |                                                       |  |
| 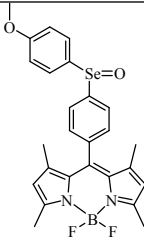   | <i>Chem. Commun.</i> , 2013, <b>49</b> , 1014-1016          | NO | --      | 510 nm     | PBS/MeCN<br>(v/v, 7/3, 20 mM, pH 7.4)                 |  |
|    | <i>Org. Lett.</i> , 2012, <b>14</b> , 2184-2187             | NO | 1 μM    | 515 nm     | PBS (10 mM, pH 7.4)                                   |  |
|   | <i>Nat. Commun.</i> , 2011, <b>2</b> , 495-501              | NO |         | 388 nm     | PBS buffer<br>(10 mM, pH 7.4, 10% CH <sub>3</sub> CN) |  |
|  | <i>Angew. Chem. Int. Ed.</i> , 2013, <b>52</b> , 1688-1691  | NO | 1 μM    | 652/510 nm | PBS/DMSO<br>(v/v, 98/2, 20 mM, pH 7.4)                |  |
|  | <i>Talanta</i> , 2018, <b>181</b> , 104-111                 | NO | 1.27 μM | 592 nm     | HEPES/DMSO<br>(v/v, 1/1, 20 mM, pH 7.4)               |  |
|  | <i>Sensor. Actuat. B-Chem.</i> , 2018, <b>262</b> , 837-844 | NO | 6 nM    | 666 nm     | HEPES/DMSO<br>(v/v, 8/2, 10 mM, pH 7.4)               |  |

|                                                                                                                                                                                                                                                                               |                                                            |                           |            |        |                                     |
|-------------------------------------------------------------------------------------------------------------------------------------------------------------------------------------------------------------------------------------------------------------------------------|------------------------------------------------------------|---------------------------|------------|--------|-------------------------------------|
| 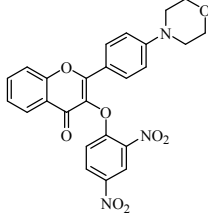                                                                                                                                                                                             | <p><i>Anal. Methods.</i>,<br/>2018, <b>10</b>, 604-610</p> | Lysosome-targeted         | 69 nM      | 547 nm | PBS/DMSO (v/v, 4/1, 10 mM, pH 7.4)  |
|  <p>R1 = -H</p>                                                                                                                                                                              | <p><i>J. Mater. Chem. B</i>, 2017, <b>5</b>, 2172-2180</p> | R2: Lysosome-targeted     | R1: 139 nM | 481 nm | PBS/DMSO (v/v, 7/3, 10 mM, pH 7.4)  |
|  <p>R2 = </p> <p>R3 = </p> |                                                            | R3: Mitochondria-targeted |            |        |                                     |
|                                                                                                                                                                                             | <p><i>Org. Biomol. Chem.</i>, 2018, <b>16</b>, 712-716</p> | Lysosome-targeted         | 214.5 nM   | 510 nm | PBS/DMSO (v/v, 9/1, 20 mM, pH 7.4)  |
|                                                                                                                                                                                            | <p><i>Chem. Eur. J.</i> 2015, <b>21</b>, 15167-15172</p>   | NO                        | ---        | 525 nm | PBS                                 |
|                                                                                                                                                                                            | <p><i>Dyes Pigments</i>, 2013, <b>99</b>, 308-315</p>      | Mitochondria-targeted     | 1.0 μM     | 440 nm | PBS (pH 7.4, 1% CH <sub>3</sub> CN) |

|                                                                                     |                                                                                  |                       |         |        |                                            |
|-------------------------------------------------------------------------------------|----------------------------------------------------------------------------------|-----------------------|---------|--------|--------------------------------------------|
| 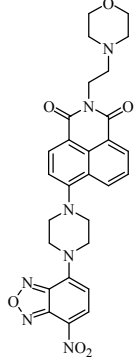   | <i>Sens Actuators B Chem.</i> , 2018, <b>260</b> , 264-273                       | Lysosome-targeted     | 330 nM  | 536 nm | PBS (10 mM, pH 7.4 or 5.0)                 |
|    | <i>Spectrochim. Acta. A Mol. Biomol. Spectrosc.</i> , 2019, <b>213</b> , 416-422 | Lysosome-targeted     | 11 nM   | 680 nm | PBS (10 mM, pH 7.2)                        |
|   | <i>Talanta</i> , 2019, <b>197</b> , 326-333                                      | Mitochondria-targeted | 89.3 nM | 720 nm | PBS/DMSO (v/v, 99/1, 10 mM, pH 7.4)        |
|  | <i>Tetrahedron</i> , 2015, <b>71</b> , 8572-8576                                 | Lysosome-targeted     | 430 nM  | 560 nm | PBS/DMSO (v/v, 98/2, 20 mM, pH 7.4 or 6.0) |
|  | <i>Anal. Chem.</i> , 2015, <b>87</b> , 1188-1195                                 | NO                    | 50 nM   | 524 nm | HEPES (pH 7.4, 1% CH <sub>3</sub> CN)      |

|                                                                                   |                      |                                   |                |               |                                       |
|-----------------------------------------------------------------------------------|----------------------|-----------------------------------|----------------|---------------|---------------------------------------|
| 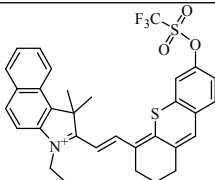 | <p>In this paper</p> | <p>Mitochondria<br/>-targeted</p> | <p>28.5 nM</p> | <p>455 nm</p> | <p>PBS/EtOH</p>                       |
|                                                                                   |                      |                                   |                |               | <p>(v/v, 1/1, 10<br/>mM, pH 7.33)</p> |

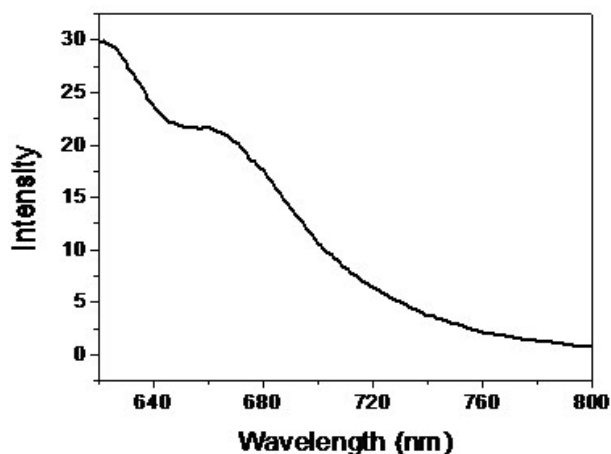

**Fig. S1.** The fluorescence intensity of L (10  $\mu$ M) responding to Na<sub>2</sub>S (10 eq.) with excitation wavelength at 600 nm.

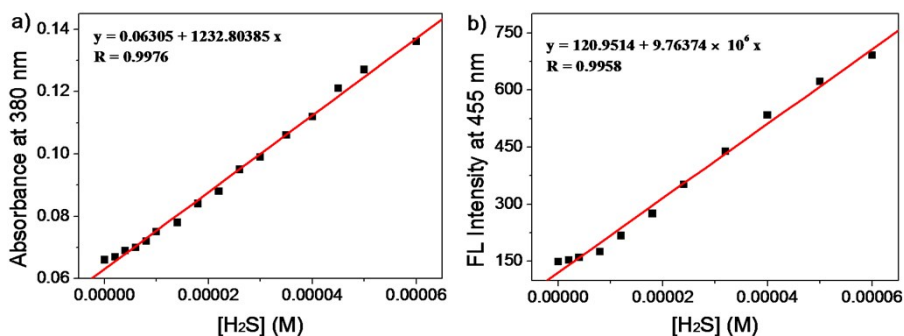

**Fig. S2.** The absorbance ( $A_{380\text{ nm}}$ , a) and fluorescence intensity ( $F_{455\text{ nm}}$ , b) of L (10  $\mu$ M) depending on Na<sub>2</sub>S concentration. A linear relationship between the absorbance and the Na<sub>2</sub>S concentration (a), and the fluorescence intensity and the Na<sub>2</sub>S concentration (b) could be obtained in the 0-60  $\mu$ M concentration range ( $R^2 = 0.9976$  and  $0.9958$ ). The detection limit (DOL) can be calculated with the equation,<sup>1</sup>  $\text{DOL} = 3\sigma/k$ , where “ $k$ ” is the intensity versus [H<sub>2</sub>S], and “ $\sigma$ ” is the standard deviation of the blank signal obtained without H<sub>2</sub>S ( $\sigma_1 = 1.22 \times 10^{-5}$  and  $0.093$ ).

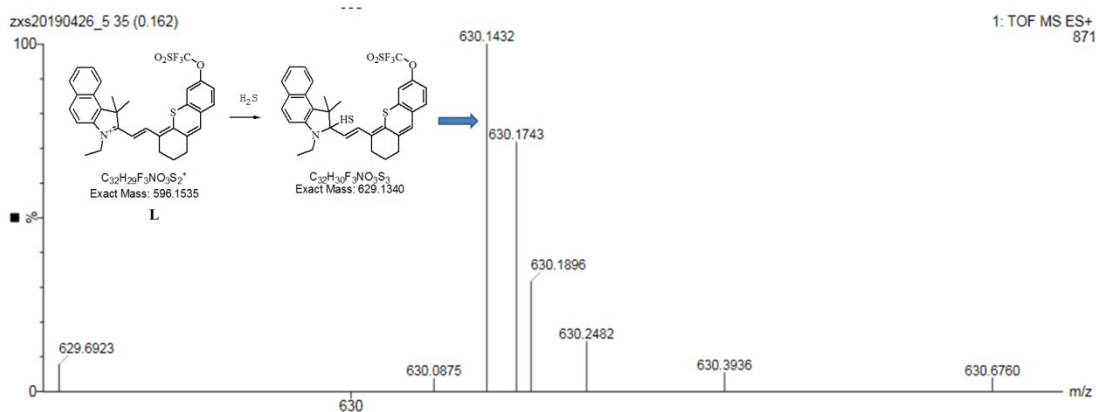

**Fig. S3.** HRMS spectrum of the solution of **L** interacted with  $Na_2S$ .

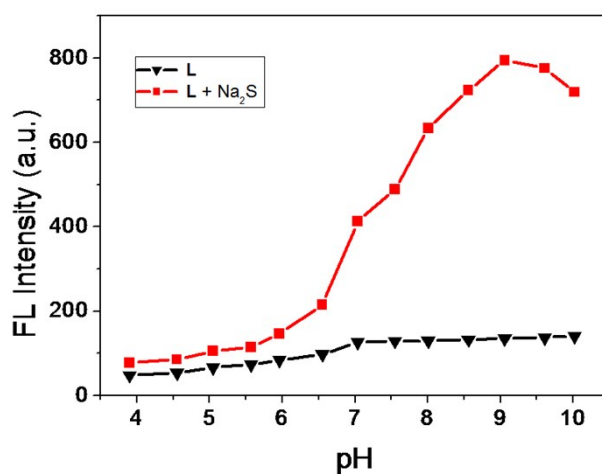

**Fig. S4.** The pH-dependent fluorescence signals of **L** (10  $\mu M$ ) in the absence and presence of  $Na_2S$  (10 eq.).  $\lambda_{ex} = 380$  nm,  $\lambda_{em} = 455$  nm.

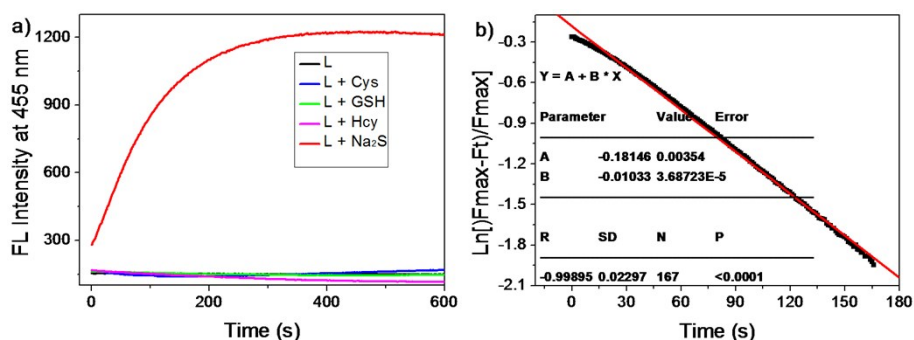

**Fig. S5.** (a) The time-dependent fluorescence signals of **L** (10  $\mu M$ ) with addition of  $Na_2S$ , Cys, Hcy and GSH (100 equiv.), respectively. (b) Kinetic analysis of the reaction of **L** and  $H_2S$ . The pseudo-first-order rate constant  $k$  can be calculated with the equation,<sup>2</sup>  $k = k'C$ , where " $k$ " is  $\ln[(F_{max}-F_t)/F_{max}]$  versus time, " $C$ " is the initial concentration of the probe **L**.  $\lambda_{ex} = 380$  nm,  $\lambda_{em} = 455$  nm.

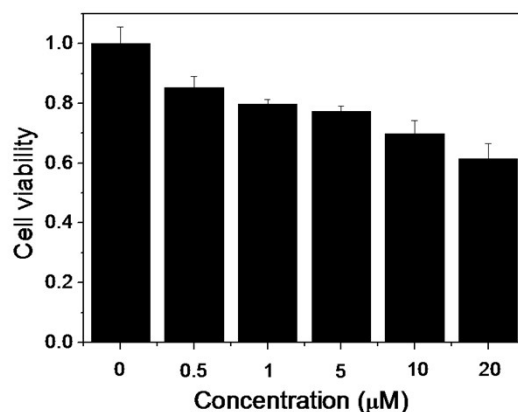

**Fig. S6.** Cell viability estimated by MTT proliferation tests versus incubation concentrations of **L**.

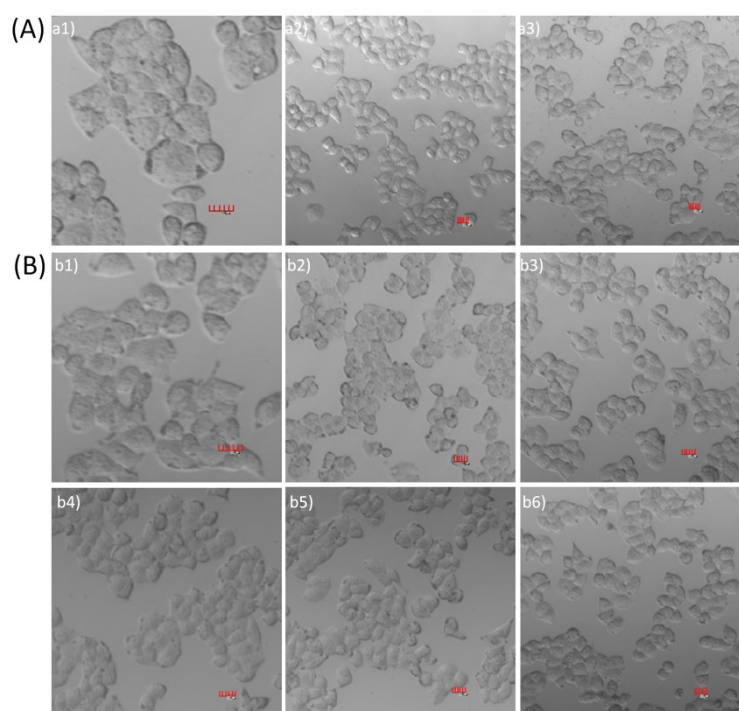

**Fig. S7.** (A) Bright field of the fluorescence images of HeLa cells incubated with **L** (2 µM) (a1), **L** (2 µM) and  $\text{Na}_2\text{S}$  (10 µM) (a2), and **L** (2 µM) and  $\text{Na}_2\text{S}$  (20 µM) (a3). (B) Bright field of the fluorescence images of HeLa cells incubated with **L** (2 µM), (b1), **L** (2 µM) and Cys (100 µM) (b2), **L** (2 µM) and Cys (200 µM) (b3), **L** (2 µM) and GSH (100 µM) (b4), **L** (2 µM) and GSH (200 µM) (b5), and **L** (2 µM) and Cys/GSH (200 µM) (b6).  $\lambda_{\text{ex}} = 405 \text{ nm}$ ,  $\lambda_{\text{em}} = 420\text{-}475 \text{ nm}$ . Scale bar: 20 µm.

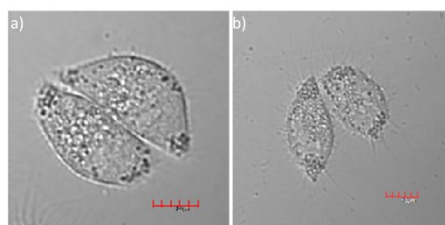

**Fig. S8.** a) Bright field of the fluorescence images of HeLa cells containing **L** and Lyso-tracker incubated with  $\text{Na}_2\text{S}$  (10 µM); b) Bright field of the fluorescence images of HeLa cells containing **L** and Mito-tracker incubated with  $\text{Na}_2\text{S}$  (10 µM). Scale bar: 10 µm

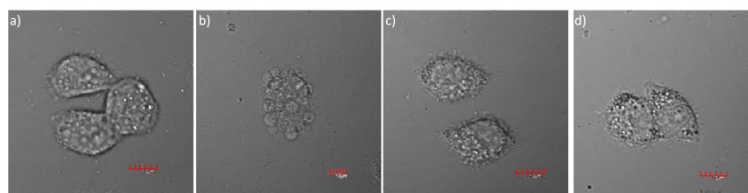

**Fig. S9.** a) Bright field of the fluorescence images of  $H_2O_2$  pretreated HeLa cells containing **L** and Lyso-tracker; b) Bright field of the fluorescence images of  $H_2O_2$  pretreated HeLa cells containing **L** and Mito-tracker; c) Bright field of the fluorescence images of PMA pretreated HeLa cells containing **L** and Lyso-tracker; d) Bright field of the fluorescence images of PMA pretreated HeLa cells containing **L** and Mito-tracker. Scale bar: 10  $\mu m$

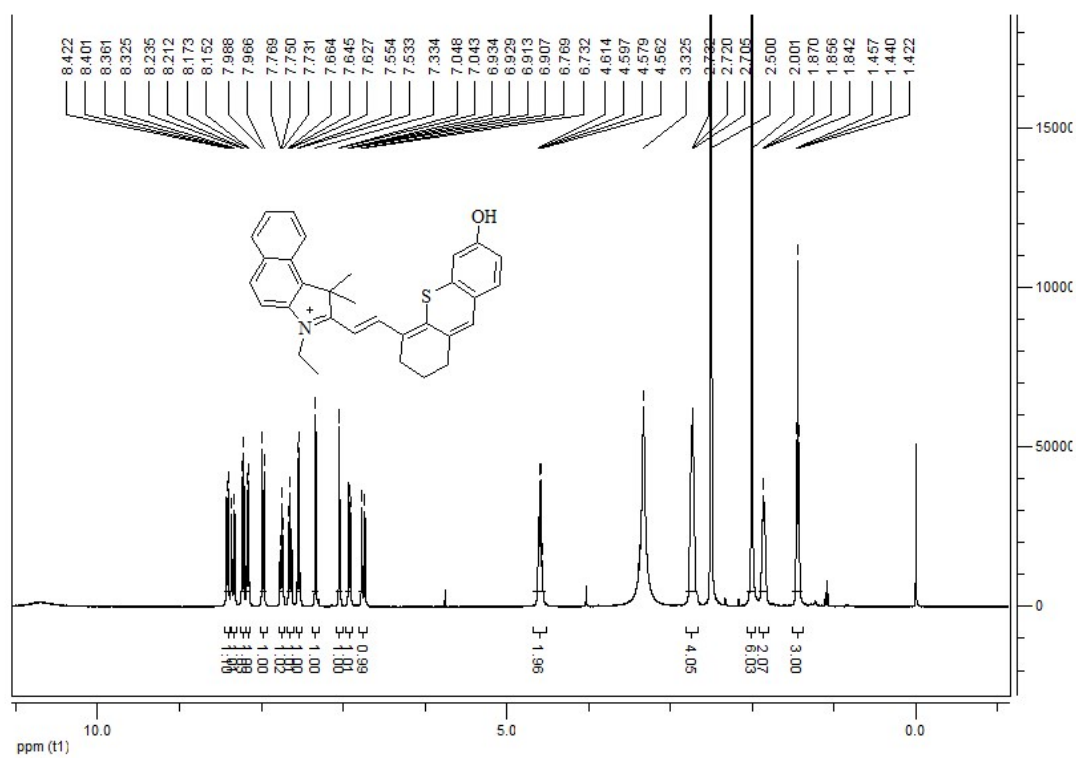

**Fig. S10.**  $^1H$  NMR spectra of **1**



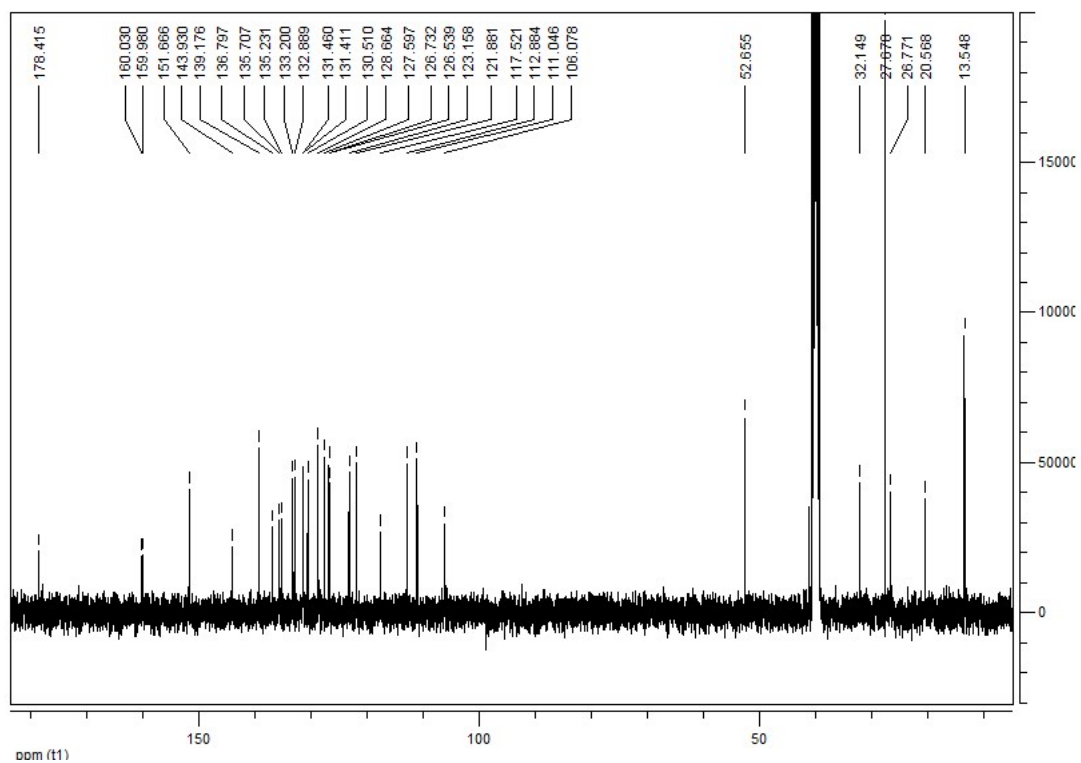

Fig. S11.  $^{13}\text{C}$  NMR spectra of **1**

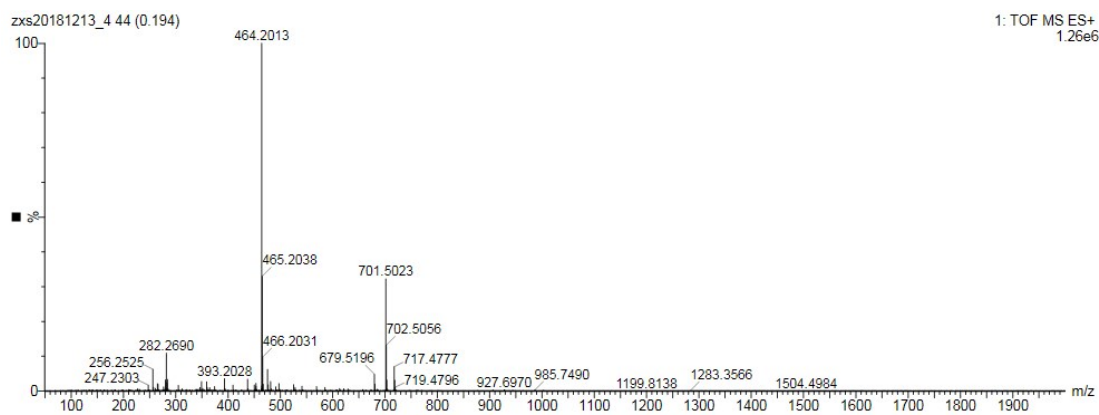

Fig. S12. HRMS spectra of **1**

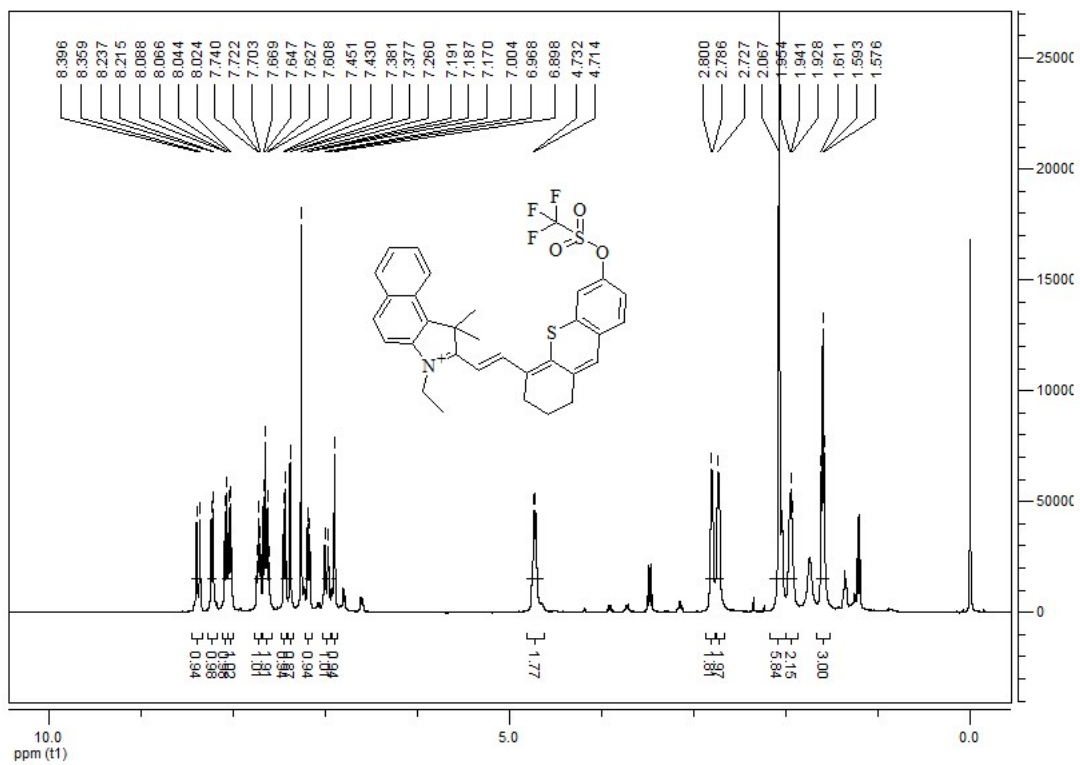

Fig. S13.  $^1\text{H}$  NMR spectra of L

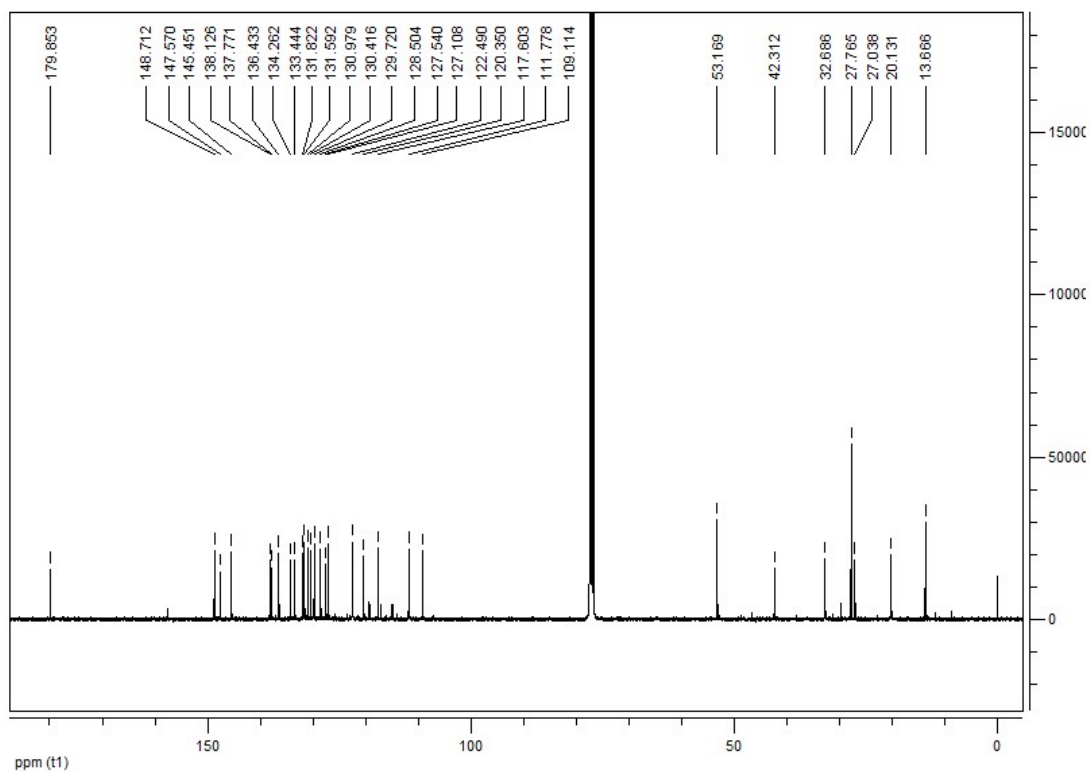

Fig. S14.  $^{13}\text{C}$  NMR spectra of L

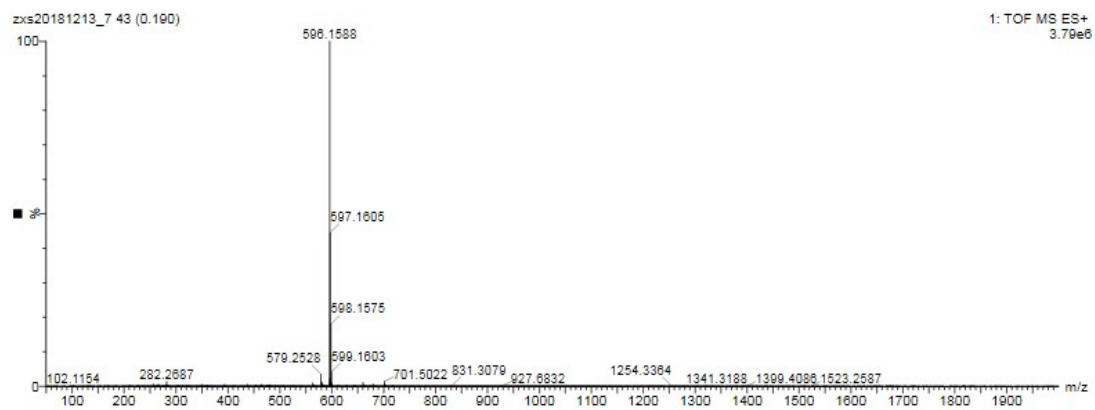

Fig. S15. HRMS spectra of L

## 2. References:

- 1 G. Long and J. Winefordner, *Anal. Chem.*, 1983, **55**, 712A-24A.
- 2 Q. X. Han, Z. H. Shi, X. L. Tang, L. Z. Yang, Z. L. Mou, J. Li, J. M. Shi, C. Y. Chen, W. Liu, H. Yang, W. S. Liu, *Org. Biomol. Chem.*, 2014, **12**, 5023–5030.
